# Supplementary material for: The role of halogens in structural diversity and chirality enhancement of 1D chiral hybrid metal halides
Source: Royal Society of Chemistry journal article supplement (doi:10.1039/d4tc01531b), 2024-01-01
Supplement: d4tc01531b1.pdf [file d4tc01531b1.pdf]

## **Supporting Information**

### **The Role of Halogens in Structural Diversity and Chirality Enhancement of 1D**

#### **Chiral Hybrid Metal Halides**

Jing-Meng Zhang,<sup>†</sup> Xiang-Bin Han,<sup>†</sup> Wei Wang, Ming-Liang Jin, Chang-Qing Jing, Chao-Yang Chai, Cheng-Dong Liu, Wen Zhang\*

## Materials and methods

Hydrochloric acid (HCl, 37wt % in water), hydrobromic acid (HBr, 48wt % in water), and hydroiodic acid (HI, 48wt% in water) were purchased from Sigma-Aldrich (Shanghai, China), Aladdin (Shanghai, China) and Meryer, respectively. Lead chloride (PbCl<sub>2</sub>, 99.99%), lead bromide (PbBr<sub>2</sub>, 99.0%), and lead Iodide (PbI<sub>2</sub>, 99.5%) were purchased from Macklin. *R*- or *S*-tetrahydro-2H-pyran-3-amine hydrochloride (*R/S*-3ATHP, ≥97.0%) were purchased from Leyan.

All the analytical grade chemicals were used as received without further purification.

Powder X-ray diffraction (PXRD) patterns were measured on a Rigaku SmartLab X-ray diffraction instrument. Thermogravimetry analyses (TGA) were conducted on a Netzsch TG 209 F3 Libra Thermo-Microbalance at a heating rate of 20 °C/minute from room temperature to 600 °C under N<sub>2</sub> atmosphere. The CD spectra were measured using a JASCO J-1700 spectrometer/data system equipped with a PM-539 detector. The samples were prepared using the KBr pellet method by pressing the thoroughly ground powder containing 1% weight percentage of the crystal and KBr into a transparent pellet. Ultraviolet-vis (UV-vis) absorption spectra were performed with Shimadzu UV-2600 equipping ISR-2600Plus integrating sphere. Photoluminescence was measured on an FLS 1000 spectrometer. The emission spectrum was measured with a Xenon lamp using a solid sample holder, nF920 Nanosecond Flashlamp, and a standard integrating sphere was used to measure the lifetime and absolute quantum yield of samples. The photoluminescence quantum yields were calculated based on the equation:  $\eta_{QE} = (I_S - I_R) / (E_R - E_S)$ , in which  $I_S$  represents the luminescence emission spectrum of the sample,  $I_R$  represents the luminescence emission spectrum of the standard white plate,  $E_R$  is the spectrum of the excitation light from the empty integrated sphere (Teflon coating), and  $E_S$  is the excitation spectrum for exciting the sample.

Crystallographic data were collected on XtaLAB Synergy R, DW system, HyPix, with Hybrid Pixel Array Detector. Data collection, refinement, and reduction were carried out with CrysAlisPro 1.171.40.84a (Rigaku OD, 2020). SHELXL-2018 in the OLEX2 interface was used to solve the single crystal structures by direct methods. All the non-hydrogen atoms were refined anisotropically, and the positions of hydrogen atoms were generated geometrically. The X-ray crystallographic data of the compounds were deposited at the Cambridge Crystallographic Data Centre (CCDC), under deposition number CCDC 2313113–2313120. These data can be obtained free of charge via

<http://www.ccdc.cam.ac.uk/conts/retrieving.html>.

**Synthesis of  $z$ -(*R/S*-3ATHP)<sub>3</sub>PbCl<sub>5</sub>:** PbCl<sub>2</sub> (2 mmol) was dissolved in 20 mL HCl solution. Then *R/S*-tetrahydro-2H-pyran-3-amine hydrochloride (*R/S*-3ATHP; 6 mmol) in 10 mL HCl solution was added. After evaporation at 55 °C for a few days, colorless needle-like crystals  $z$ -(*R/S*-3ATHP)<sub>3</sub>PbCl<sub>5</sub> were obtained. Yield: 62%.

**Synthesis of  $z$ -(*R/S*-3ATHP)<sub>3</sub>PbBr<sub>5</sub> and  $l$ -(*R/S*-3ATHP)PbBr<sub>3</sub>:** PbBr<sub>2</sub> (2 mmol) was dissolved in 15 mL HBr solution. Then *R/S*-3ATHP (2 or 6 mmol) in 8 mL HBr solution was added. After evaporation at 55 °C for a few days, colorless needle-like crystals  $z$ -(*R/S*-3ATHP)<sub>3</sub>PbBr<sub>5</sub> and block crystals  $l$ -(*R/S*-3ATHP)PbBr<sub>3</sub> were obtained. Yield: 53.

**Synthesis of  $l$ -(*R/S*-3ATHP)PbI<sub>3</sub>:** PbI<sub>2</sub> (2 mmol) was dissolved in 10 mL HI solution. Then *R/S*-3ATHP (2 mmol) in 5 mL HI solution was added. After evaporation at 55 °C for a few days, yellowish block crystals  $l$ -(*R/S*-3ATHP)PbI<sub>3</sub> were obtained. Yield: 54%

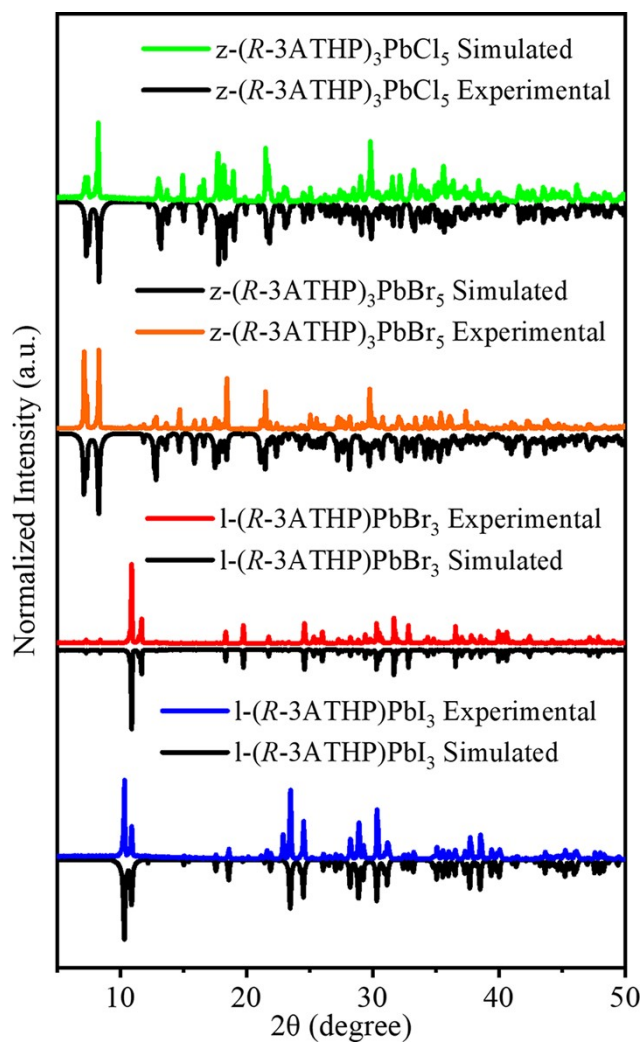

**Figure S1.** Measured and simulated PXRD patterns of z-(R-3ATHP)<sub>3</sub>PbCl<sub>5</sub>, z-(R-3ATHP)<sub>3</sub>PbBr<sub>5</sub>, l-(R-3ATHP)PbBr<sub>3</sub>, and l-(R-3ATHP)PbI<sub>3</sub> at room temperature.

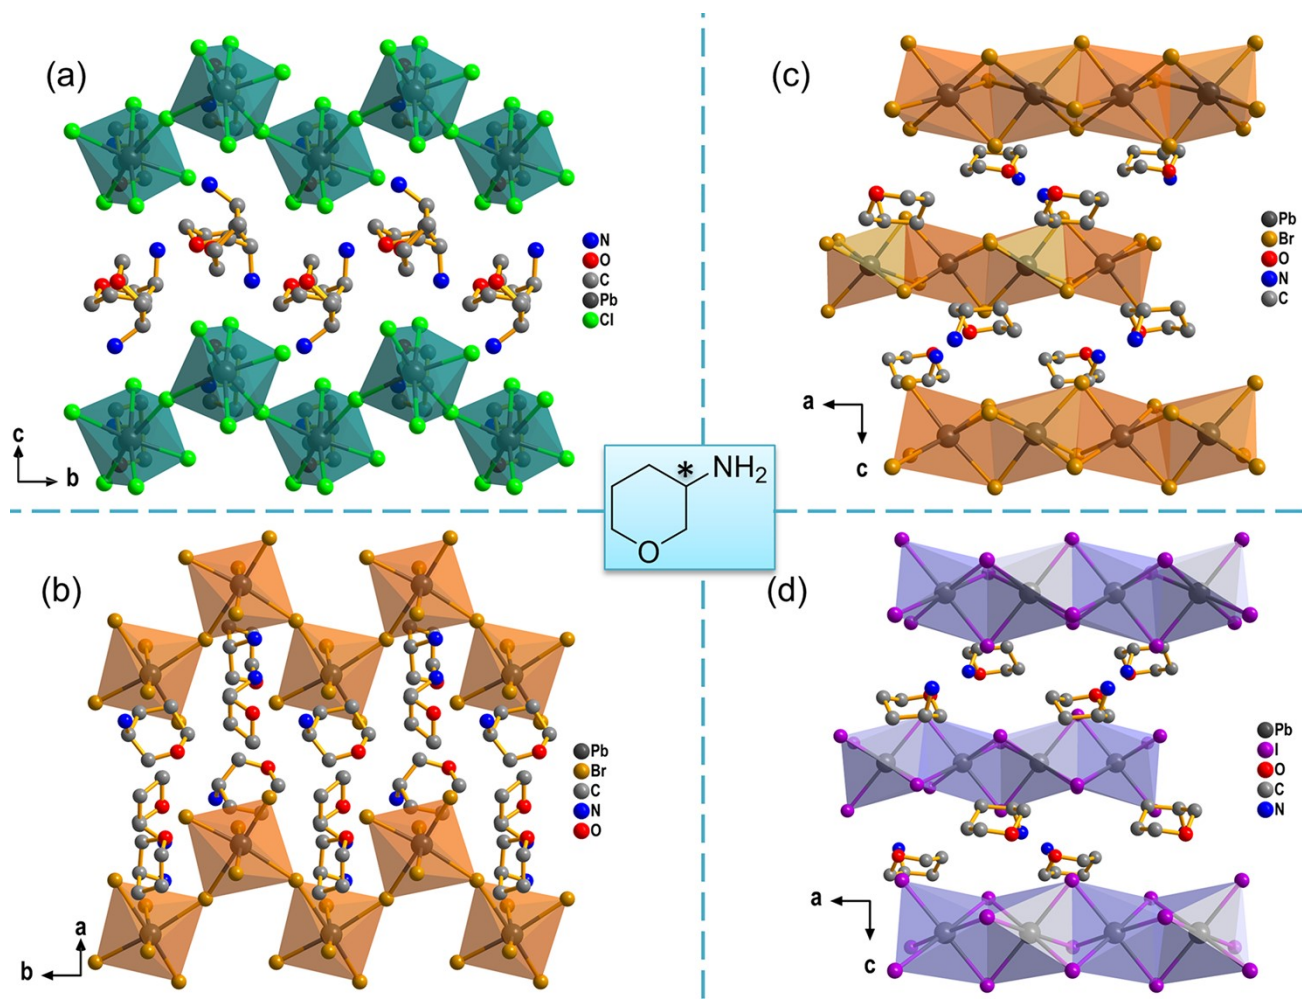

**Figure S2.** Crystal structures of (a)  $z\text{-}(S\text{-}3\text{ATHP})_3\text{PbCl}_5$ , (b)  $z\text{-}(S\text{-}3\text{ATHP})_3\text{PbBr}_5$ , (c)  $l\text{-}(S\text{-}3\text{ATHP})\text{PbBr}_3$ , and (d)  $l\text{-}(S\text{-}3\text{ATHP})\text{PbI}_3$ .

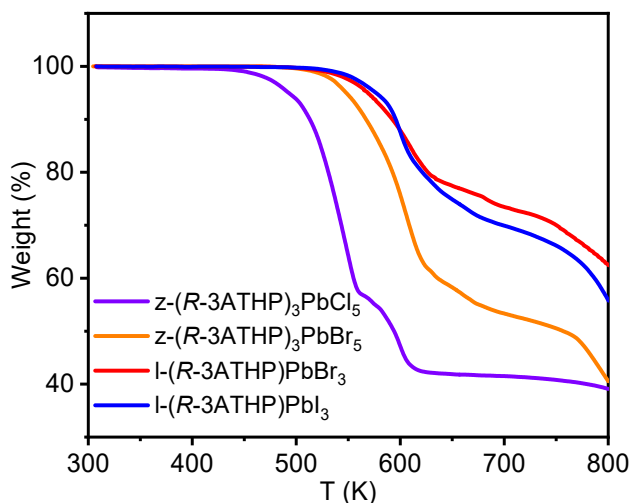

**Figure S3.** Thermogravimetric analysis curves of  $z$ -(*R*-3ATHP)<sub>3</sub>PbCl<sub>5</sub>,  $z$ -(*R*-3ATHP)<sub>3</sub>PbBr<sub>5</sub>, *l*-(*R*-3ATHP)PbBr<sub>3</sub>, and *l*-(*R*-3ATHP)PbI<sub>3</sub>.

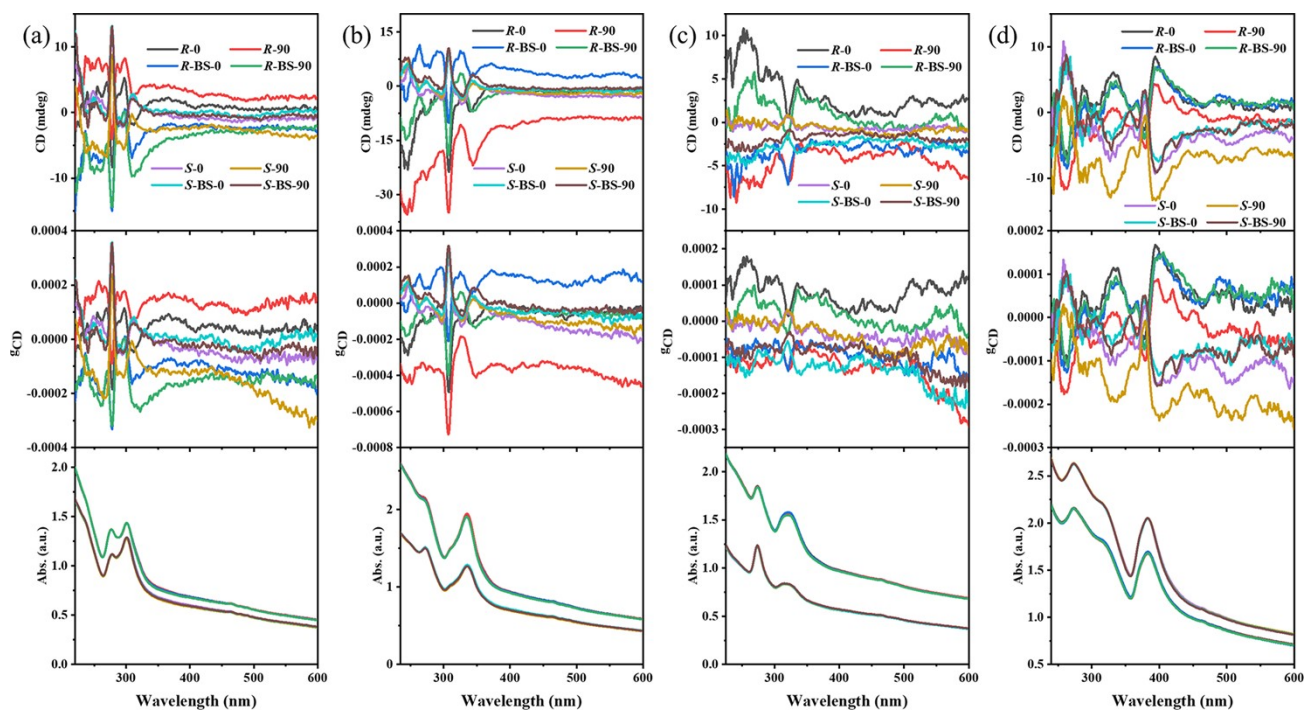

**Figure S4.** CD,  $g_{CD}$ , and absorption spectra of (a)  $z$ -(*R/S*-3ATHP)<sub>3</sub>PbCl<sub>5</sub>, (b)  $z$ -(*R/S*-3ATHP)<sub>3</sub>PbBr<sub>5</sub>, (c) *l*-(*R/S*-3ATHP)PbBr<sub>3</sub>, and (d) *l*-(*R/S*-3ATHP)PbI<sub>3</sub>. Note: 0 and 90 mean 0° and 90°, respectively; BS means a back side test by flipping the sample.

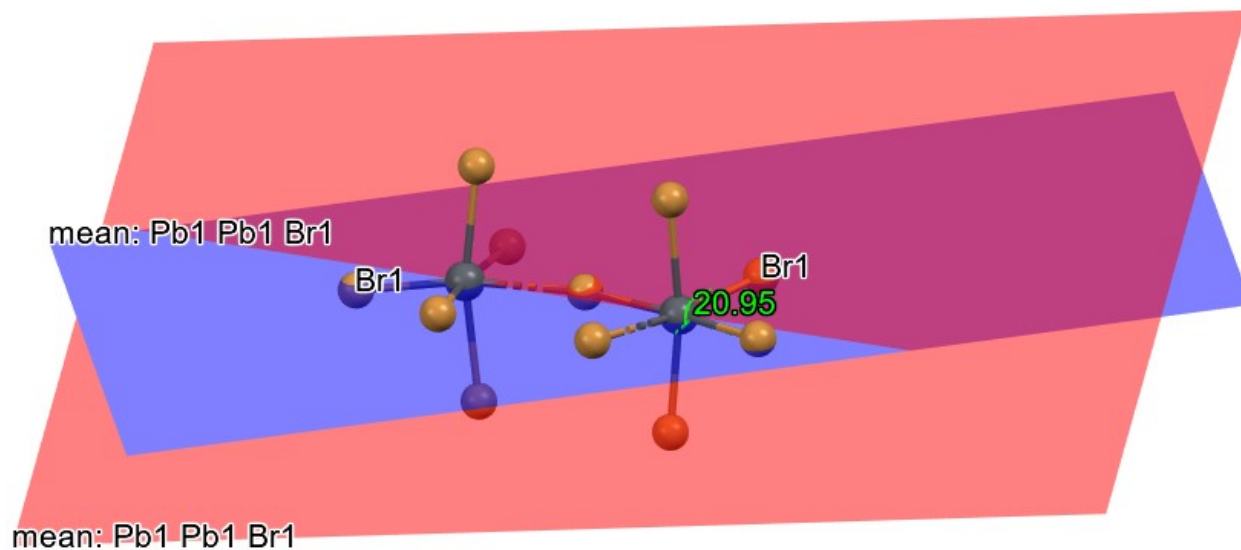

**Figure S5.** Example of the dihedral angle measurement of  $z$ -(*R/S*-3ATHP)<sub>3</sub>PbBr<sub>5</sub>.

**Table S1.** Crystallographic data and structural refinement details for zigzag crystals.

|                                                                                                           | <i>z</i> -( <i>R</i> -3ATHP) <sub>3</sub> PbCl <sub>5</sub>                     | <i>z</i> -( <i>S</i> -3ATHP) <sub>3</sub> PbCl <sub>5</sub>                     | <i>z</i> -( <i>R</i> -3ATHP) <sub>3</sub> PbBr <sub>5</sub>                     | <i>z</i> -( <i>S</i> -3ATHP) <sub>3</sub> PbBr <sub>5</sub>                     |
|-----------------------------------------------------------------------------------------------------------|---------------------------------------------------------------------------------|---------------------------------------------------------------------------------|---------------------------------------------------------------------------------|---------------------------------------------------------------------------------|
| CCDC No.                                                                                                  | 2313114                                                                         | 2313120                                                                         | 2313113                                                                         | 2313117                                                                         |
| Chain type                                                                                                | zigzag                                                                          | zigzag                                                                          | zigzag                                                                          | zigzag                                                                          |
| Formula                                                                                                   | C <sub>15</sub> H <sub>36</sub> N <sub>3</sub> O <sub>3</sub> PbCl <sub>5</sub> | C <sub>15</sub> H <sub>36</sub> N <sub>3</sub> O <sub>3</sub> PbCl <sub>5</sub> | C <sub>15</sub> H <sub>36</sub> N <sub>3</sub> O <sub>3</sub> PbBr <sub>5</sub> | C <sub>15</sub> H <sub>36</sub> N <sub>3</sub> O <sub>3</sub> PbBr <sub>5</sub> |
| Formula weight                                                                                            | 690.91                                                                          | 690.91                                                                          | 913.21                                                                          | 913.21                                                                          |
| <i>T</i> / K                                                                                              | 293 (2)                                                                         | 293 (2)                                                                         | 293 (2)                                                                         | 293(2)                                                                          |
| Space group                                                                                               | <i>P</i> 2 <sub>1</sub>                                                         | <i>P</i> 2 <sub>1</sub>                                                         | <i>P</i> 2 <sub>1</sub>                                                         | <i>P</i> 2 <sub>1</sub>                                                         |
| <i>a</i> / Å                                                                                              | 12.6821 (3)                                                                     | 12.6836(4)                                                                      | 12.8366 (3)                                                                     | 12.8323(5)                                                                      |
| <i>b</i> / Å                                                                                              | 8.1424 (2)                                                                      | 8.1333(3)                                                                       | 8.4095 (10)                                                                     | 8.4061(3)                                                                       |
| <i>c</i> / Å                                                                                              | 13.0057 (4)                                                                     | 13.0112(5)                                                                      | 13.2067 (3)                                                                     | 13.2111(4)                                                                      |
| $\beta$ / °                                                                                               | 111.683 (3)                                                                     | 111.745(4)                                                                      | 110.073(2)                                                                      | 110.059(4)                                                                      |
| <i>V</i> / Å <sup>3</sup>                                                                                 | 1247.98 (6)                                                                     | 1246.72(8)                                                                      | 1339.05 (5)                                                                     | 1338.63(9)                                                                      |
| <i>Z</i>                                                                                                  | 2                                                                               | 2                                                                               | 2                                                                               | 2                                                                               |
| <i>D</i> <sub>calc</sub> / g·cm <sup>-3</sup>                                                             | 1.839                                                                           | 1.840                                                                           | 2.265                                                                           | 2.266                                                                           |
| $\mu$ / mm <sup>-1</sup>                                                                                  | 7.314                                                                           | 7.322                                                                           | 13.779                                                                          | 13.783                                                                          |
| <i>F</i> (000)                                                                                            | 676                                                                             | 676                                                                             | 856                                                                             | 856                                                                             |
| $\theta$ range / °                                                                                        | 2.825-30.788                                                                    | 2.827-30.594                                                                    | 2.730-30.885                                                                    | 1.909-30.304                                                                    |
| Reflns collected                                                                                          | 15378                                                                           | 8728                                                                            | 34043                                                                           | 10640                                                                           |
| Independent reflns ( <i>R</i> <sub>int</sub> )                                                            | 5964(0.0204)                                                                    | 4967(0.0195)                                                                    | 7019(0.0364)                                                                    | 5834(0.0238)                                                                    |
| no. parameters                                                                                            | 248                                                                             | 248                                                                             | 248                                                                             | 248                                                                             |
| <i>R</i> <sub>1</sub> <sup>[a]</sup> , <i>wR</i> <sub>2</sub> <sup>[b]</sup> [ <i>I</i> > 2σ( <i>I</i> )] | 0.0159, 0.0338                                                                  | 0.0176, 0.0349                                                                  | 0.0233, 0.0397                                                                  | 0.0249, 0.0468                                                                  |
| <i>R</i> <sub>1</sub> , <i>wR</i> <sub>2</sub> [all data]                                                 | 0.0175, 0.0340                                                                  | 0.0199, 0.0353                                                                  | 0.0284, 0.0403                                                                  | 0.0302, 0.0478                                                                  |
| GOF                                                                                                       | 1.025                                                                           | 0.986                                                                           | 1.028                                                                           | 0.977                                                                           |
| $\Delta\rho$ <sup>[c]</sup> / e·Å <sup>-3</sup>                                                           | 0.70, -0.49                                                                     | 0.449, -0.627                                                                   | 0.79, -0.72                                                                     | 0.775, -0.835                                                                   |

<sup>[a]</sup>  $R_1 = \Sigma ||F_o| - |F_c|| / \Sigma |F_o|$ .

<sup>[b]</sup>  $wR_2 = [\Sigma w(F_o^2 - F_c^2)^2 / \Sigma w(F_o^2)^2]^{1/2}$ .

<sup>[c]</sup> Maximum and minimum residual electron density.



**Table S2.** Crystallographic data and structural refinement details for linear crystals.

|                                                                                                           | <b>l-(R-<br/>3ATHP)PbBr<sub>3</sub></b>               | <b>l-(S-3ATHP)PbBr<sub>3</sub></b>                    | <b>l-(R-<br/>3ATHP)PbI<sub>3</sub></b>                | <b>l-(S-3ATHP)PbI<sub>3</sub></b>                     |
|-----------------------------------------------------------------------------------------------------------|-------------------------------------------------------|-------------------------------------------------------|-------------------------------------------------------|-------------------------------------------------------|
| CCDC No.                                                                                                  | 2313115                                               | 2313118                                               | 2313119                                               | 2313116                                               |
| Chain type                                                                                                | linear                                                | linear                                                | linear                                                | linear                                                |
| Formula                                                                                                   | C <sub>5</sub> H <sub>12</sub> NOPbBr <sub>3</sub>    | C <sub>5</sub> H <sub>12</sub> NOPbBr <sub>3</sub>    | C <sub>5</sub> H <sub>12</sub> NOPbI <sub>3</sub>     | C <sub>5</sub> H <sub>12</sub> NOPbI <sub>3</sub>     |
| Formula weight                                                                                            | 549.08                                                | 549.08                                                | 690.05                                                | 690.05                                                |
| <i>T</i> / K                                                                                              | 293 (2)                                               | 293 (2)                                               | 293 (2)                                               | 293(2)                                                |
| Space group                                                                                               | <i>P</i> 2 <sub>1</sub> 2 <sub>1</sub> 2 <sub>1</sub> |
| <i>a</i> / Å                                                                                              | 7.8266 (2)                                            | 7.8311(3)                                             | 8.1109 (2)                                            | 8.1132(2)                                             |
| <i>b</i> / Å                                                                                              | 9.7351 (3)                                            | 9.7259(4)                                             | 10.0931 (3)                                           | 10.0979(3)                                            |
| <i>c</i> / Å                                                                                              | 15.3312 (4)                                           | 15.3368(6)                                            | 16.2409 (4)                                           | 16.2628(4)                                            |
| $\beta$ / °                                                                                               | 90                                                    | 90                                                    | 90                                                    | 90                                                    |
| <i>V</i> / Å <sup>3</sup>                                                                                 | 1168.13 (6)                                           | 1168.12(8)                                            | 1329.55 (6)                                           | 1332.35(6)                                            |
| <i>Z</i>                                                                                                  | 4                                                     | 4                                                     | 4                                                     | 4                                                     |
| <i>D</i> <sub>calc</sub> / g·cm <sup>-3</sup>                                                             | 3.122                                                 | 3.122                                                 | 3.447                                                 | 3.440                                                 |
| $\mu$ / mm <sup>-1</sup>                                                                                  | 24.661                                                | 24.661                                                | 19.618                                                | 19.577                                                |
| <i>F</i> (000)                                                                                            | 976                                                   | 976                                                   | 1192                                                  | 1192                                                  |
| $\theta$ range / °                                                                                        | 2.478-30.599                                          | 2.480-30.475                                          | 2.376-30.514                                          | 2.374-30.720                                          |
| Reflns collected                                                                                          | 14333                                                 | 6163                                                  | 16665                                                 | 11281                                                 |
| Independent reflns ( <i>R</i> <sub>int</sub> )                                                            | 2987(0.0930)                                          | 2614                                                  | 3476(0.0379)                                          | 3371(0.0295)                                          |
| no. parameters                                                                                            | 102                                                   | 102                                                   | 102                                                   | 102                                                   |
| <i>R</i> <sub>1</sub> <sup>[a]</sup> , <i>wR</i> <sub>2</sub> <sup>[b]</sup> [ <i>I</i> > 2σ( <i>I</i> )] | 0.0369, 0.0812                                        | 0.0359, 0.0735                                        | 0.0217, 0.0425                                        | 0.0237, 0.0509                                        |
| <i>R</i> <sub>1</sub> , <i>wR</i> <sub>2</sub> [all data]                                                 | 0.0441, 0.0833                                        | 0.0444, 0.0757                                        | 0.0277, 0.0436                                        | 0.0297, 0.0521                                        |
| GOF                                                                                                       | 1.008                                                 | 1.011                                                 | 1.001                                                 | 1.029                                                 |
| $\Delta\rho$ <sup>[c]</sup> / e·Å <sup>-3</sup>                                                           | 1.81, -1.66                                           | 1.875, -1.157                                         | 1.04, -0.93                                           | 1.116, -0.768                                         |

<sup>[a]</sup>  $R_1 = \Sigma ||F_o| - |F_c|| / \Sigma |F_o|$ .

<sup>[b]</sup>  $wR_2 = [\Sigma w(F_o^2 - F_c^2)^2 / \Sigma w(F_o^2)^2]^{1/2}$ .

<sup>[c]</sup> Maximum and minimum residual electron density.

**Table S3.** Hydrogen bonds geometry (Å, degree) for *z*-(*R*-3ATHP)<sub>3</sub>PbCl<sub>5</sub>, *z*-(*R*-3ATHP)<sub>3</sub>PbBr<sub>5</sub>, *l*-(*R*-3ATHP)<sub>3</sub>PbBr<sub>3</sub>, and *l*-(*R*-3ATHP)<sub>3</sub>PbI<sub>3</sub> at 293 K.

| D–H⋯A                                                        | <i>d</i> (D–H) | <i>d</i> (H⋯A) | <i>d</i> (D⋯A) | ∠D–H–A |
|--------------------------------------------------------------|----------------|----------------|----------------|--------|
| <b><i>z</i>-(<i>R</i>-3ATHP)<sub>3</sub>PbCl<sub>5</sub></b> |                |                |                |        |
| N1–H1E–Cl4 <sup>i</sup>                                      | 0.89           | 2.44           | 3.228(4)       | 148    |
| N2–H2A–Cl1                                                   | 0.89           | 2.53           | 3.330(4)       | 149    |
| N2–H2B–Cl2                                                   | 0.89           | 2.50           | 3.290(4)       | 148    |
| N2–H2C–Cl3 <sup>ii</sup>                                     | 0.89           | 2.56           | 3.417(4)       | 163    |
| N3–H3A–Cl3                                                   | 0.89           | 2.46           | 3.294(3)       | 156    |
| N3–H3B–Cl1                                                   | 0.89           | 2.38           | 3.238(4)       | 163    |
| N3–H3C–Cl2                                                   | 0.89           | 2.61           | 3.325(4)       | 138    |
| <b><i>z</i>-(<i>R</i>-3ATHP)<sub>3</sub>PbBr<sub>5</sub></b> |                |                |                |        |
| N1–H1C–Br1 <sup>i</sup>                                      | 0.89           | 2.60           | 3.411(5)       | 152    |
| N2–H2A–Br5                                                   | 0.89           | 2.62           | 3.436(5)       | 153    |
| N2–H2B–Br4 <sup>iii</sup>                                    | 0.89           | 2.71           | 3.556(5)       | 158    |
| N2–H2C–Br2                                                   | 0.89           | 2.70           | 3.496(5)       | 149    |
| N3–H3C–Br4                                                   | 0.89           | 2.61           | 3.455(4)       | 159    |
| N3–H3D–Br2                                                   | 0.89           | 2.56           | 3.425(5)       | 166    |
| N3–H3E–Br5                                                   | 0.89           | 2.75           | 3.480(5)       | 140    |
| <b><i>l</i>-(<i>R</i>-3ATHP)<sub>3</sub>PbBr<sub>3</sub></b> |                |                |                |        |
| N1–H1A–Br3 <sup>iv</sup>                                     | 0.89           | 2.52           | 3.383(8)       | 163    |
| N1–H1C–Br2                                                   | 0.89           | 2.77           | 3.505(8)       | 141    |
| <b><i>l</i>-(<i>R</i>-3ATHP)<sub>3</sub>PbI<sub>3</sub></b>  |                |                |                |        |
| N1–H1A–I1 <sup>v</sup>                                       | 0.89           | 2.74           | 3.576(5)       | 158    |

Symmetry codes: (i) *x*, *y*,  $-1+z$ ; (ii)  $1-x$ ,  $-1/2+y$ ,  $1-z$ ; (iii)  $-x$ ,  $-1/2+y$ ,  $1-z$ ; (iv)  $-x$ ,  $-1/2+y$ ,  $3/2-z$ ; (v)  $1-x$ ,  $-1/2+y$ ,  $3/2-z$ .

**Table S4.** Dihedral angles between adjacent octahedra in *z*-(*R*-3ATHP)<sub>3</sub>PbCl<sub>5</sub>, *z*-(*R*-3ATHP)<sub>3</sub>PbBr<sub>5</sub>, *l*-(*R*-3ATHP)<sub>3</sub>PbBr<sub>3</sub>, and *l*-(*R*-3ATHP)<sub>3</sub>PbI<sub>3</sub> at 293 K.

| Compounds                                                   | Mean plane 1  | Mean plane 2  | Dihedral angle / ° |
|-------------------------------------------------------------|---------------|---------------|--------------------|
| <i>z</i> -( <i>R</i> -3ATHP) <sub>3</sub> PbCl <sub>5</sub> | Pb1, Cl1, Pb1 | Pb1, Cl1, Pb1 | 4.28               |
|                                                             | Pb1, Cl2, Pb1 | Pb1, Cl2, Pb1 | 2.91               |
|                                                             | Pb1, Cl3, Pb1 | Pb1, Cl3, Pb1 | 7.18               |
|                                                             | Pb1, Cl4, Pb1 | Pb1, Cl4, Pb1 | 12.76              |
|                                                             | Pb1, Cl5, Pb1 | Pb1, Cl5, Pb1 | 1.36               |
|                                                             | Pb1, Cl5, Pb1 | Pb1, Cl5, Pb1 | 0.89               |

|                                                     |               |               |       |
|-----------------------------------------------------|---------------|---------------|-------|
|                                                     | Pb1, Br1, Pb1 | Pb1, Br1, Pb1 | 20.95 |
|                                                     | Pb1, Br2, Pb1 | Pb1, Br2, Pb1 | 3.53  |
| z-( <i>R</i> -3ATHP) <sub>3</sub> PbBr <sub>5</sub> | Pb1, Br3, Pb1 | Pb1, Br3, Pb1 | 1.54  |
|                                                     | Pb1, Br4, Pb1 | Pb1, Br4, Pb1 | 6.25  |
|                                                     | Pb1, Br5, Pb1 | Pb1, Br5, Pb1 | 0.19  |
|                                                     | Pb1, Br3, Pb1 | Pb1, Br3, Pb1 | 1.00  |
|                                                     | Pb1, Br1, Pb1 | Pb1, Br1, Pb1 | 1.65  |
|                                                     | Pb1, Br2, Pb1 | Pb1, Br2, Pb1 | 2.66  |
| l-( <i>R</i> -3ATHP)PbBr <sub>3</sub>               | Pb1, Br3, Pb1 | Pb1, Br3, Pb1 | 1.18  |
|                                                     | Pb1, Br1, Pb1 | Pb1, Br1, Pb1 | 1.18  |
|                                                     | Pb1, Br2, Pb1 | Pb1, Br2, Pb1 | 2.67  |
|                                                     | Pb1, Br3, Pb1 | Pb1, Br3, Pb1 | 1.49  |
|                                                     | Pb1, I1, Pb1  | Pb1, I1, Pb1  | 0.32  |
|                                                     | Pb1, I2, Pb1  | Pb1, I2, Pb1  | 0.16  |
| l-( <i>R</i> -3ATHP)PbI <sub>3</sub>                | Pb1, I3, Pb1  | Pb1, I3, Pb1  | 0.15  |
|                                                     | Pb1, I1, Pb1  | Pb1, I1, Pb1  | 0.33  |
|                                                     | Pb1, I2, Pb1  | Pb1, I2, Pb1  | 0.17  |
|                                                     | Pb1, I3, Pb1  | Pb1, I3, Pb1  | 0.16  |

---
